# Supplementary material
Source: PubMed Central journal article supplement (PMC3190602)
Supplement: NIHMS320735-supplement-1_si_001.pdf [file NIHMS320735-supplement-1_si_001.pdf]

# Supporting information for: **AMASS: Algorithm for MSI Analysis by Semi-supervised Segmentation**

Jocelyne Bruand,<sup>\*,†</sup> Theodore Alexandrov,<sup>‡</sup> Srinivas Sistla,<sup>†</sup> Maxence  
Wisztorski,<sup>¶</sup> Céline Meriaux,<sup>¶</sup> Michael Becker,<sup>§</sup> Michel Salzet,<sup>¶</sup> Isabelle Fournier,<sup>¶</sup>  
Eduardo Macagno,<sup>†</sup> and Vineet Bafna<sup>†</sup>

*University of California, San Diego, La Jolla, USA, University of Bremen, Bremen, Germany ,  
FABMS, Université Lille 1, Villeneuve d'Ascq, France , and Bruker Daltonik GmbH, Bremen,  
Germany*

E-mail: [jocelyne@ucsd.edu](mailto:jocelyne@ucsd.edu)

## **Supplementary Figures**

---

\*To whom correspondence should be addressed

<sup>†</sup>University of California, San Diego

<sup>‡</sup>University of Bremen

<sup>¶</sup>Université Lille 1

<sup>§</sup>Bruker Daltonik GmbH

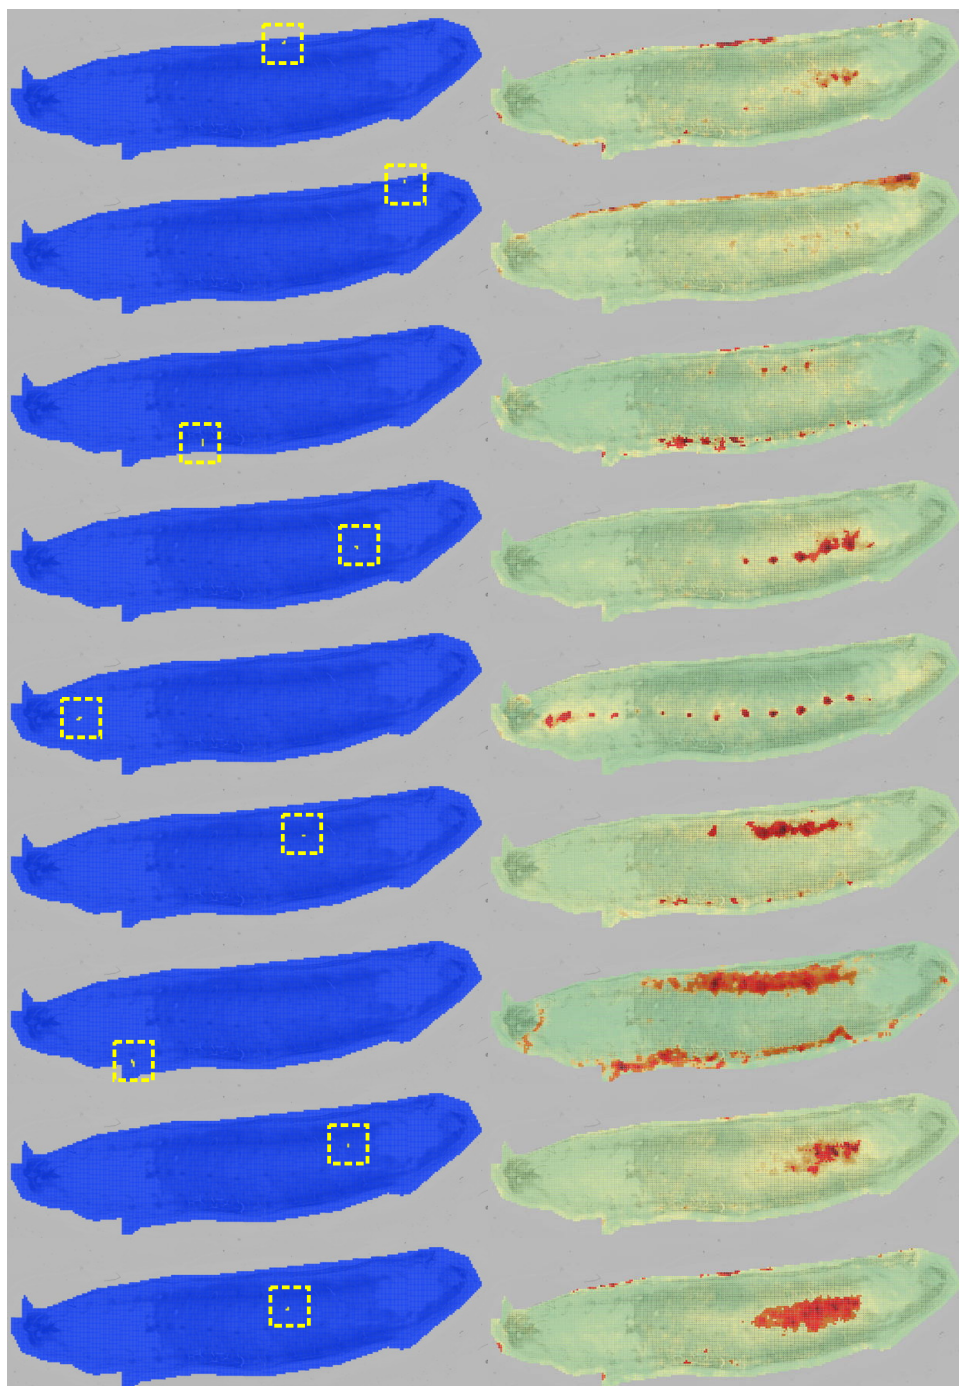

Figure 1: Querying with small random seeds also results in meaningful regions. Unlike the case of user-defined queries, many of the queries lead to similar results and some queries lead to lower quality results. Shown here are a few hand-selected random results. While the resulting log-odds images are in general not as specific as their user-defined counterpart, they still highlight different regions with specific molecular signatures. We can also expect the regions to gain specificity on the next iteration of the algorithm.



| ganglia 2-4 |        | ganglia 13-15 |        | images                                                                              |
|-------------|--------|---------------|--------|-------------------------------------------------------------------------------------|
| m/z         | weight | m/z           | weight |                                                                                     |
| 5273.47     | 0.76   |               |        | 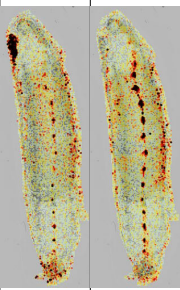   |
| 5418.19     | 0.82   | 5414.12       | 0.78   |    |
| 5422.26     | 0.78   | 5416.16       | 0.77   |                                                                                     |
| 5425.31     | 0.70   | 5418.19       | 0.80   |                                                                                     |
| 5564.53     | 0.90   | 5419.21       | 0.71   |                                                                                     |
| 5573.80     | 0.98   | 5567.96       | 0.94   |    |
| 5574.83     | 0.98   | 5570.37       | 0.96   |                                                                                     |
| 5575.86     | 0.98   | 5571.40       | 0.94   |                                                                                     |
| 5576.90     | 0.97   | 5572.43       | 0.92   |                                                                                     |
| 5577.93     | 0.93   | 5573.46       | 0.82   |                                                                                     |
| 5578.96     | 0.90   | 5574.49       | 0.78   |                                                                                     |
| 5581.71     | 0.93   | 5576.21       | 0.71   |                                                                                     |
| 5582.74     | 0.87   |               |        |                                                                                     |
| 5587.90     | 0.82   |               |        |                                                                                     |
| 8423.80     | 0.90   |               |        |                                                                                     |
| 8427.60     | 0.90   | 8428.03       | 0.89   |   |
| 8431.41     | 0.93   | 8429.29       | 0.80   |                                                                                     |
| 8432.68     | 0.89   |               |        |  |
| 8433.95     | 0.88   |               |        |                                                                                     |
| 8435.22     | 0.77   | 8561.77       | 0.74   |                                                                                     |
|             |        | 9461.98       | 0.77   |  |
|             |        | 9463.33       | 0.74   |                                                                                     |

| ganglia 2-4 |        | ganglia 13-15 |        | images                                                                               |
|-------------|--------|---------------|--------|--------------------------------------------------------------------------------------|
| m/z         | weight | m/z           | weight |                                                                                      |
|             |        | 2473.88       | 0.82   | 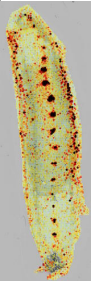   |
|             |        | 2475.03       | 0.77   |                                                                                      |
|             |        | 2476.86       | 0.76   |                                                                                      |
|             |        | 2478.69       | 0.78   |                                                                                      |
| 2523.77     | 0.75   | 2523.77       | 0.90   |    |
| 2525.62     | 0.75   | 2524.92       | 0.73   |                                                                                      |
| 3091.63     | 0.77   | 3095.98       | 0.73   |    |
|             |        |               |        |                                                                                      |
| 3299.11     | 0.80   |               |        |    |
| 3300.69     | 0.78   |               |        |                                                                                      |
|             |        | 3488.03       | 0.77   |    |
|             |        | 3490.74       | 0.84   |                                                                                      |
| 3494.28     | 0.73   | 3497.00       | 0.82   |                                                                                      |
| 3501.62     | 0.88   | 3502.71       | 0.96   |                                                                                      |
|             |        | 3504.35       | 0.95   |   |
|             |        | 3505.98       | 0.95   |                                                                                      |
| 3510.61     | 0.98   | 3511.16       | 0.93   |    |
| 3511.70     | 0.98   |               |        |                                                                                      |
| 3512.79     | 0.98   |               |        |                                                                                      |
| 3513.89     | 0.97   |               |        |                                                                                      |
| 3514.98     | 0.97   |               |        |                                                                                      |
| 3516.07     | 0.93   |               |        |                                                                                      |
| 3517.16     | 0.88   |               |        |                                                                                      |
| 3518.25     | 0.75   |               |        |                                                                                      |
|             |        | 3652.40       | 0.74   |  |
|             |        | 3654.07       | 0.72   |                                                                                      |
| 4006.51     | 0.74   |               |        |  |
| 4008.26     | 0.81   |               |        |                                                                                      |
|             |        | 4374.30       | 0.80   |  |
|             |        | 4376.12       | 0.82   |                                                                                      |
|             |        | 4377.95       | 0.82   |                                                                                      |
|             |        | 4379.17       | 0.75   |                                                                                      |

Figure 2: Specific molecules from the same morphological segment sometimes have slightly different signatures. We look at the molecular signatures of two queries: anterior and posterior ganglia. While many molecules are expressed throughout the CNS, some m/z values (3299,4377,5293) have differentiated signatures, consistent with the rostricaudal gradient of leech.

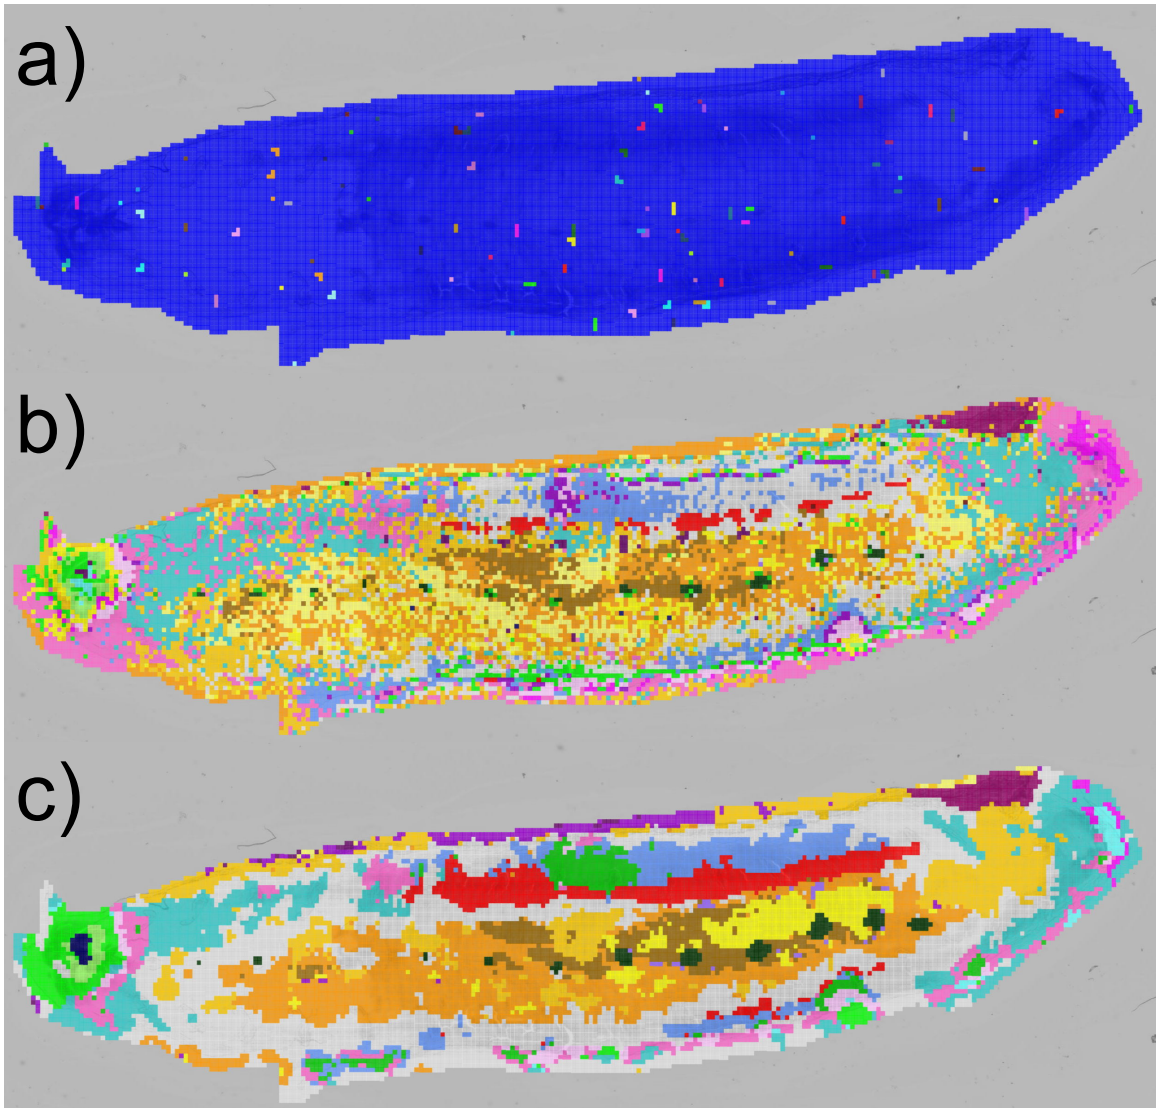

Figure 3: Segmentation results with and without smoothing after 10 iterations for random initial random segmentation in leech. a) Initial random segmentation. b) Resulting segmentation map without smoothing. c) Resulting segmentation map with 3x3 median smoothing.

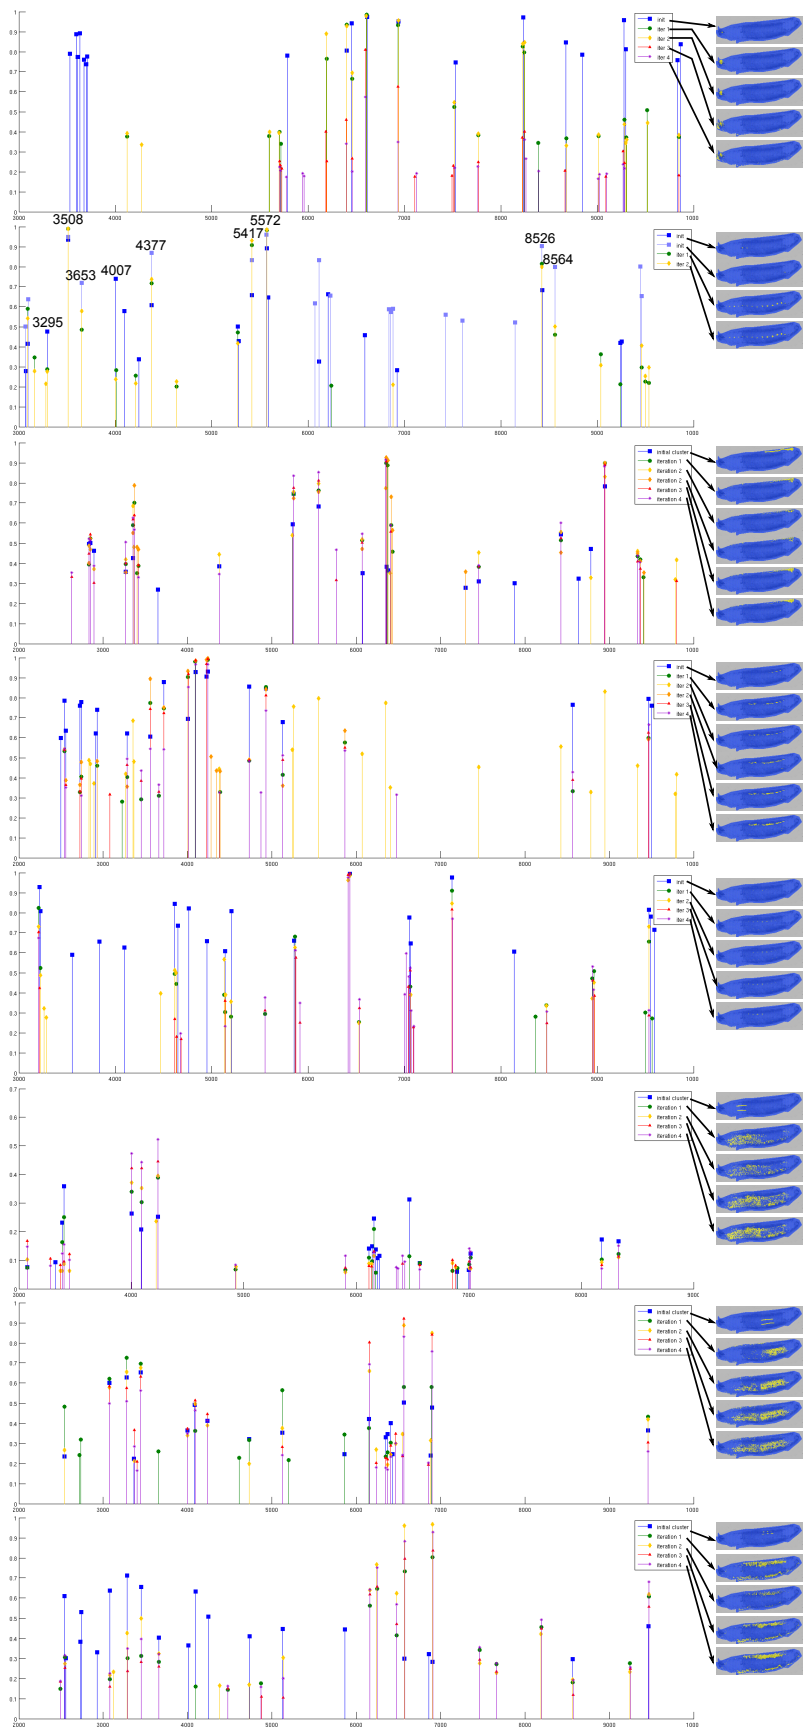

Figure 4: Top 20 score peaks at least 10 Daltons apart for segments in leech at successive iterations.

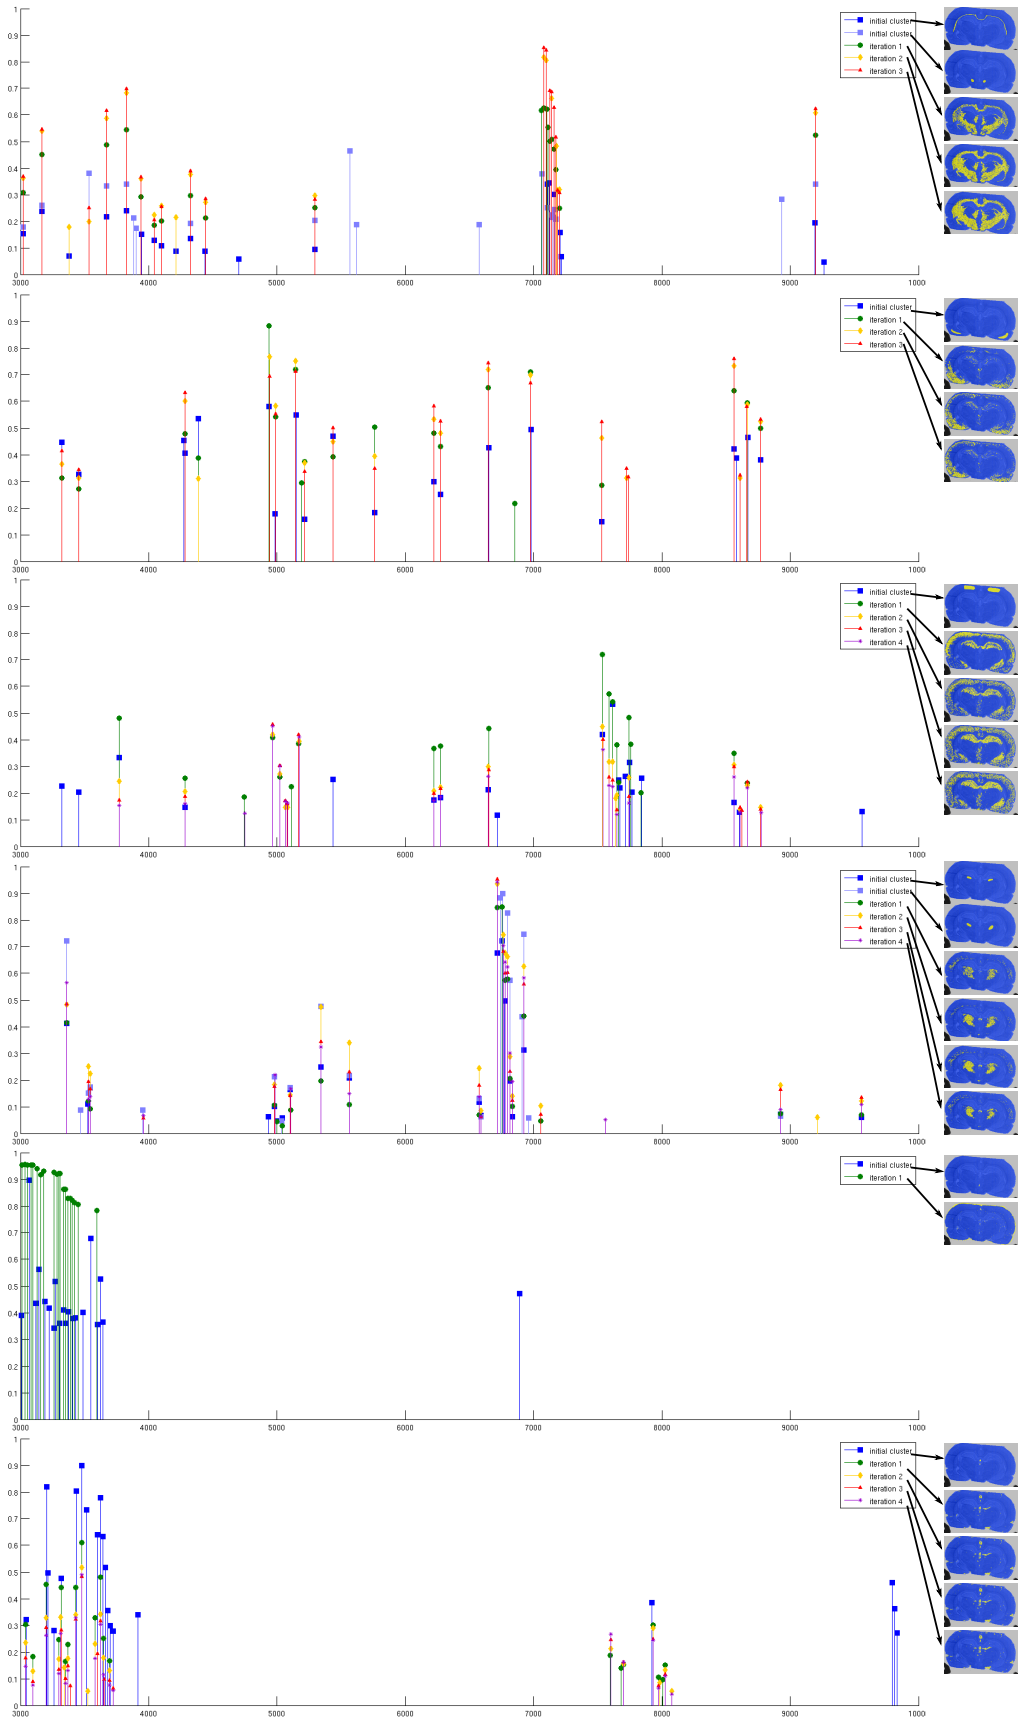

Figure 5: Top 20 score peaks at least 10 Daltons apart for segments in rat at successive iterations.

| retrosplenial cortex |        | parietal association cortex |        | primary somatosensory cortex |        | auditory cortex |        |
|----------------------|--------|-----------------------------|--------|------------------------------|--------|-----------------|--------|
| m/z                  | weight | m/z                         | weight | m/z                          | weight | m/z             | weight |
|                      |        | 3765.5                      | 0.32   |                              |        |                 |        |
|                      |        | 3767.5                      | 0.33   |                              |        |                 |        |
|                      |        |                             |        |                              |        | 6720.5          | 0.34   |
|                      |        |                             |        |                              |        | 6722.5          | 0.33   |
|                      |        |                             |        |                              |        | 6725.0          | 0.34   |
|                      |        |                             |        |                              |        | 6728.5          | 0.34   |
|                      |        |                             |        |                              |        | 6731.0          | 0.34   |
| 7534.5               | 0.33   | 7532.5                      | 0.42   | 7529.0                       | 0.33   |                 |        |
| 7537.5               | 0.34   | 7534.5                      | 0.42   | 7532.5                       | 0.33   |                 |        |
| 7541.0               | 0.34   |                             |        |                              |        |                 |        |
| 7543.0               | 0.33   |                             |        |                              |        |                 |        |
| 7546.5               | 0.31   |                             |        |                              |        |                 |        |
|                      |        |                             |        | 7568.5                       | 0.33   |                 |        |
|                      |        |                             |        | 7571.5                       | 0.36   |                 |        |
|                      |        |                             |        | 7574.0                       | 0.35   |                 |        |
|                      |        |                             |        | 7580.0                       | 0.31   |                 |        |
|                      |        | 7611.5                      | 0.51   |                              |        |                 |        |
|                      |        | 7614.0                      | 0.53   |                              |        |                 |        |
|                      |        | 7617.0                      | 0.51   |                              |        |                 |        |
|                      |        | 7619.5                      | 0.46   |                              |        |                 |        |
|                      |        | 7747.5                      | 0.31   |                              |        |                 |        |
| 7840.0               | 0.31   |                             |        |                              |        |                 |        |
| 7842.5               | 0.32   |                             |        |                              |        |                 |        |
| 7845.5               | 0.32   |                             |        |                              |        |                 |        |
| 9559.5               | 0.39   |                             |        |                              |        |                 |        |
| 9563.0               | 0.39   |                             |        |                              |        |                 |        |
| 9981.0               | 0.32   |                             |        |                              |        |                 |        |

Figure 6: Molecules expressed in different regions of the rat brain cortex.



| piriform cortex |        | amygdala |        | image |
|-----------------|--------|----------|--------|-------|
| m/z             | weight | m/z      | weight |       |
| 3321.0          | 0.40   |          |        |       |
| 3322.5          | 0.47   | 3322.5   | 0.52   |       |
| 3325.0          | 0.45   | 3324.5   | 0.45   |       |
| 3326.5          | 0.35   | 3327.0   | 0.33   |       |
| 3451.0          | 0.33   |          |        |       |
| 3453.5          | 0.53   |          |        |       |
| 3455.0          | 0.52   | 3455.0   | 0.33   |       |
| 3457.0          | 0.50   | 3457.5   | 0.30   |       |
| 3459.0          | 0.35   |          |        |       |
|                 |        | 4270.5   | 0.47   |       |
|                 |        | 4273.0   | 0.45   |       |
|                 |        | 4275.0   | 0.37   |       |
| 4276.5          | 0.39   |          |        |       |
| 4279.0          | 0.42   |          |        |       |
| 4281.0          | 0.44   | 4281.5   | 0.42   |       |
| 4283.0          | 0.40   | 4283.5   | 0.41   |       |
| 4285.5          | 0.36   |          |        |       |
|                 |        |          |        |       |
|                 |        | 4383.5   | 0.42   |       |
|                 |        | 4385.5   | 0.53   |       |
|                 |        | 4388.0   | 0.50   |       |
|                 |        | 4390.5   | 0.41   |       |
| 4931.5          | 0.32   | 4931.0   | 0.44   |       |
| 4933.5          | 0.37   | 4932.0   | 0.54   |       |
| 4936.0          | 0.38   | 4936.0   | 0.59   |       |
| 4938.0          | 0.34   | 4938.0   | 0.57   |       |
|                 |        | 4940.5   | 0.52   |       |
|                 |        | 5141.5   | 0.32   |       |
|                 |        | 5143.5   | 0.42   |       |
| 5146.0          | 0.38   | 5146.5   | 0.52   |       |
| 5148.5          | 0.38   | 5148.0   | 0.55   |       |
| 5151.0          | 0.33   | 5151.0   | 0.49   |       |
|                 |        | 5434.5   | 0.36   |       |
| 5436.5          | 0.31   | 5436.5   | 0.47   |       |
|                 |        | 5439.0   | 0.46   |       |
|                 |        | 5442.0   | 0.32   |       |
| 6218.0          | 0.47   |          |        |       |
| 6221.0          | 0.50   |          |        |       |
| 6223.5          | 0.54   |          |        |       |
| 6225.5          | 0.50   |          |        |       |
| 6228.0          | 0.48   |          |        |       |
| 6270.0          | 0.39   |          |        |       |
| 6272.5          | 0.48   |          |        |       |
| 6275.0          | 0.47   |          |        |       |
| 6277.5          | 0.42   |          |        |       |
| 6279.5          | 0.35   |          |        |       |

| piriform cortex |        | amygdala |        | image |
|-----------------|--------|----------|--------|-------|
| m/z             | weight | m/z      | weight |       |
| 6643.0          | 0.60   | 6643.0   | 0.35   |       |
| 6646.0          | 0.65   | 6646.0   | 0.41   |       |
| 6647.5          | 0.62   | 6648.5   | 0.43   |       |
| 6651.0          | 0.61   | 6650.5   | 0.39   |       |
| 6653.5          | 0.61   | 6654.0   | 0.33   |       |
| 6854.0          | 0.33   |          |        |       |
| 6972.5          | 0.39   | 6972.5   | 0.34   |       |
| 6975.5          | 0.48   | 6976.0   | 0.48   |       |
| 6978.0          | 0.46   | 6978.5   | 0.49   |       |
| 6981.0          | 0.33   | 6981.0   | 0.42   |       |
| 8558.0          | 0.34   |          |        |       |
| 8561.0          | 0.37   | 8560.5   | 0.40   |       |
| 8564.0          | 0.37   | 8563.0   | 0.46   |       |
| 8566.5          | 0.34   | 8567.0   | 0.47   |       |
|                 |        | 8569.5   | 0.41   |       |
| 8581.5          | 0.33   | 8582.0   | 0.39   |       |
|                 |        | 8660.0   | 0.40   |       |
| 8663.0          | 0.30   | 8663.0   | 0.46   |       |
| 8666.5          | 0.37   | 8666.0   | 0.46   |       |
| 8669.0          | 0.35   | 8669.5   | 0.47   |       |
| 8672.5          | 0.32   | 8672.5   | 0.41   |       |
|                 |        |          |        |       |
| 8767.0          | 0.31   | 8766.5   | 0.38   |       |
| 8770.0          | 0.33   | 8769.5   | 0.38   |       |
|                 |        | 8772.5   | 0.37   |       |
|                 |        | 8776.0   | 0.38   |       |
|                 |        | 8778.5   | 0.37   |       |
|                 |        | 10942.0  | 0.33   |       |
|                 |        | 10944.5  | 0.40   |       |
|                 |        | 10948.0  | 0.38   |       |
|                 |        | 10951.5  | 0.30   |       |
|                 |        | 21860.5  | 0.46   |       |
|                 |        | 21870.5  | 0.48   |       |
|                 |        | 21875.5  | 0.47   |       |
|                 |        | 21880.0  | 0.46   |       |
|                 |        | 21885.0  | 0.44   |       |
|                 |        | 21918.0  | 0.31   |       |

Figure 7: Molecules expressed in the amygdala and piriform cortex of the rat brain.

| dentate gyrus |        | CA1-CA3 axons |        | CA1-CA3 cell bodies |        | CA3 cell bodies |        | images |
|---------------|--------|---------------|--------|---------------------|--------|-----------------|--------|--------|
| m/z           | weight | m/z           | weight | m/z                 | weight | m/z             | weight |        |
|               |        | 4958.5        | 0.44   |                     |        |                 |        |        |
|               |        | 4961.5        | 0.47   |                     |        |                 |        |        |
|               |        | 4963.0        | 0.46   |                     |        |                 |        |        |
|               |        | 4966.0        | 0.44   |                     |        |                 |        |        |
| 5000.0        | 0.32   | 5000.5        | 0.43   | 5000.5              | 0.23   |                 |        |        |
| 5002.5        | 0.32   |               |        | 5003.0              | 0.22   |                 |        |        |
|               |        | 5021.0        | 0.38   |                     |        |                 |        |        |
|               |        | 5023.5        | 0.38   |                     |        |                 |        |        |
| 5039.0        | 0.33   | 5037.5        | 0.41   | 5037.0              | 0.21   |                 |        |        |
| 5042.0        | 0.31   | 5039.5        | 0.41   | 5039.0              | 0.21   |                 |        |        |
|               |        | 5057.5        | 0.33   |                     |        |                 |        |        |
| 5080.5        | 0.32   |               |        |                     |        |                 |        |        |
|               |        | 5102.0        | 0.33   |                     |        |                 |        |        |
|               |        | 5104.5        | 0.34   |                     |        |                 |        |        |
|               |        | 5113.5        | 0.33   |                     |        |                 |        |        |
|               |        | 5165.0        | 0.43   |                     |        |                 |        |        |
|               |        | 5167.5        | 0.46   |                     |        |                 |        |        |
|               |        | 5169.5        | 0.47   |                     |        |                 |        |        |
|               |        | 5171.5        | 0.46   |                     |        |                 |        |        |
|               |        | 5174.0        | 0.44   |                     |        |                 |        |        |
|               |        | 5762.5        | 0.37   |                     |        |                 |        |        |
|               |        | 5765.0        | 0.34   |                     |        |                 |        |        |
|               |        |               |        |                     |        | 6221.0          | 0.61   |        |
|               |        |               |        |                     |        | 6223.5          | 0.62   |        |
|               |        |               |        |                     |        | 6226.0          | 0.64   |        |
|               |        |               |        |                     |        | 6228.5          | 0.60   |        |
|               |        |               |        |                     |        | 6233.5          | 0.55   |        |
|               |        |               |        |                     |        | 6272.5          | 0.58   |        |
|               |        |               |        |                     |        | 6275.0          | 0.63   |        |
|               |        |               |        |                     |        | 6277.0          | 0.59   |        |
|               |        |               |        |                     |        | 6280.0          | 0.55   |        |
|               |        |               |        |                     |        | 6282.5          | 0.53   |        |
|               |        |               |        |                     |        | 6643.5          | 0.34   |        |
|               |        |               |        |                     |        | 6645.5          | 0.36   |        |
|               |        |               |        |                     |        | 6648.0          | 0.39   |        |
|               |        |               |        |                     |        | 6650.5          | 0.37   |        |
|               |        |               |        |                     |        | 6654.0          | 0.32   |        |
|               |        |               |        |                     |        | 8444.0          | 0.32   |        |
|               |        |               |        |                     |        | 8446.5          | 0.60   |        |
|               |        |               |        |                     |        | 8449.5          | 0.54   |        |
|               |        |               |        |                     |        | 8452.5          | 0.53   |        |
|               |        |               |        |                     |        | 8456.0          | 0.36   |        |

Figure 8: Molecules expressed in different regions of the rat brain hippocampus.

| paraventricular thal. nucleus |        | ventral posteromedial thal. nucleus |        | lateral habenular nucleus |        | medial habenular nucleus (cont'd) |        |
|-------------------------------|--------|-------------------------------------|--------|---------------------------|--------|-----------------------------------|--------|
| m/z                           | weight | m/z                                 | weight | m/z                       | weight | m/z                               | weight |
| 3953.5                        | 0.50   | 3355.0                              | 0.33   | 3530.5                    | 0.34   | 7003.0                            | 0.43   |
| 3956.0                        | 0.61   | 3356.5                              | 0.62   | 3544.0                    | 0.38   | 7014.0                            | 0.64   |
| 4273.0                        | 0.32   | 3359.0                              | 0.72   | 5562.5                    | 0.43   | 7016.5                            | 0.62   |
| 4383.5                        | 0.61   | 3360.5                              | 0.54   | 5564.5                    | 0.47   | 7025.0                            | 0.40   |
| 4385.5                        | 0.50   | 5341.5                              | 0.41   | 5567.0                    | 0.59   | 8450.0                            | 0.35   |
| 4388.0                        | 0.56   | 5343.5                              | 0.48   | 5569.5                    | 0.33   | 9563.5                            | 0.38   |
| 4390.0                        | 0.40   | 5346.5                              | 0.44   | 10600.50                  | 0.41   | 9938.5                            | 0.35   |
| 4392.0                        | 0.38   | 6739.0                              | 0.88   | 10604.00                  | 0.40   | 10607.00                          | 0.40   |
| 4934.0                        | 0.32   | 6752.5                              | 0.88   | 10607.50                  | 0.54   | 10614.00                          | 0.38   |
| 4936.5                        | 0.34   | 6754.5                              | 0.89   | 10611.00                  | 0.36   | 11256.50                          | 0.37   |
| 4938.5                        | 0.32   | 6757.5                              | 0.90   | 10614.50                  | 0.41   | 11277.50                          | 0.42   |
| 5765.0                        | 0.39   | 6760.5                              | 0.89   | 12121.50                  | 0.31   | 11277.50                          | 0.42   |
| 6221.0                        | 0.33   | 6795.0                              | 0.83   |                           |        | 11301.00                          | 0.49   |
| 6223.0                        | 0.35   | 6802.5                              | 0.59   |                           |        | 11322.00                          | 0.54   |
| 6225.5                        | 0.30   | 6810.5                              | 0.48   |                           |        | 11336.50                          | 0.50   |
| 6228.5                        | 0.30   | 6813.5                              | 0.57   |                           |        | 11340.00                          | 0.52   |
| 6275.0                        | 0.34   | 6816.0                              | 0.55   |                           |        | 11342.50                          | 0.51   |
| 6277.0                        | 0.36   | 6911.0                              | 0.44   |                           |        | 11356.50                          | 0.43   |
| 6279.5                        | 0.32   | 6921.5                              | 0.65   |                           |        | 11378.00                          | 0.55   |
| 9537.5                        | 0.47   | 6924.5                              | 0.75   |                           |        | 11388.50                          | 0.51   |
| 9560.0                        | 0.46   | 6926.5                              | 0.70   |                           |        | 11409.00                          | 0.34   |
| 9563.0                        | 0.62   | 6929.5                              | 0.53   |                           |        | 11481.50                          | 0.30   |
| 9569.5                        | 0.47   |                                     |        |                           |        | 13758.00                          | 0.40   |
| 9573.0                        | 0.46   |                                     |        |                           |        | 13769.50                          | 0.49   |

  

| lateral post. thal. nucleus |        | ventral posteromedial thal. nucleus |        | medial habenular nucleus |        |
|-----------------------------|--------|-------------------------------------|--------|--------------------------|--------|
| m/z                         | weight | m/z                                 | weight | m/z                      | weight |
| 3356.5                      | 0.32   | 6739.0                              | 0.59   | 5346.0                   | 0.39   |
| 3359.0                      | 0.41   | 6744.5                              | 0.57   | 5567.5                   | 0.33   |
| 6717.5                      | 0.68   | 6754.5                              | 0.61   | 6215.5                   | 0.30   |
| 6752.5                      | 0.68   | 6757.5                              | 0.57   | 6223.5                   | 0.32   |
| 6755.0                      | 0.72   | 6760.0                              | 0.59   | 6270.0                   | 0.30   |
| 6757.0                      | 0.71   | 6792.5                              | 0.41   | 6272.0                   | 0.33   |
| 6760.0                      | 0.69   | 6795.0                              | 0.43   | 6277.0                   | 0.36   |
| 6773.0                      | 0.50   | 6926.5                              | 0.31   | 6545.5                   | 0.33   |
| 6924.5                      | 0.31   |                                     |        | 6595.5                   | 0.35   |
|                             |        |                                     |        | 6741.5                   | 0.71   |
|                             |        |                                     |        | 6747.0                   | 0.74   |
|                             |        |                                     |        | 6754.5                   | 0.73   |
|                             |        |                                     |        | 6760.0                   | 0.78   |
|                             |        |                                     |        | 6762.5                   | 0.75   |
|                             |        |                                     |        | 6794.5                   | 0.53   |
|                             |        |                                     |        | 6798.0                   | 0.54   |
|                             |        |                                     |        | 6889.5                   | 0.46   |
|                             |        |                                     |        | 6891.5                   | 0.42   |
|                             |        |                                     |        | 6924.0                   | 0.59   |
|                             |        |                                     |        | 6926.5                   | 0.44   |
|                             |        |                                     |        | 6929.5                   | 0.54   |
|                             |        |                                     |        | 6951.5                   | 0.30   |
|                             |        |                                     |        | 6986.0                   | 0.40   |

  

|          |      |
|----------|------|
| 7003.0   | 0.43 |
| 7014.0   | 0.64 |
| 7016.5   | 0.62 |
| 7025.0   | 0.40 |
| 8450.0   | 0.35 |
| 9563.5   | 0.38 |
| 9938.5   | 0.35 |
| 10607.00 | 0.40 |
| 10614.00 | 0.38 |
| 11256.50 | 0.37 |
| 11277.50 | 0.42 |
| 11301.00 | 0.49 |
| 11322.00 | 0.54 |
| 11336.50 | 0.50 |
| 11340.00 | 0.52 |
| 11342.50 | 0.51 |
| 11356.50 | 0.43 |
| 11378.00 | 0.55 |
| 11388.50 | 0.51 |
| 11409.00 | 0.34 |
| 11481.50 | 0.30 |
| 13758.00 | 0.40 |
| 13769.50 | 0.49 |
| 13773.50 | 0.51 |
| 13777.50 | 0.42 |
| 13781.50 | 0.57 |
| 13812.00 | 0.38 |
| 13823.50 | 0.41 |
| 13831.00 | 0.41 |
| 13862.00 | 0.47 |
| 13869.50 | 0.41 |
| 13873.00 | 0.42 |
| 13895.50 | 0.42 |
| 13900.00 | 0.45 |
| 13911.00 | 0.30 |
| 13934.00 | 0.36 |
| 13938.00 | 0.37 |
| 13957.00 | 0.35 |
| 13988.00 | 0.38 |
| 14000.00 | 0.36 |
| 14007.00 | 0.39 |
| 14011.00 | 0.36 |
| 14022.50 | 0.35 |
| 15281.50 | 0.32 |

Figure 9: Molecules expressed in different regions of the rat brain thalamus and epithalamus.

| posterior<br>hypothal. area |        | lateral<br>hypothal. area |        | lateral<br>hypothal. area<br>(cont'd) |        |
|-----------------------------|--------|---------------------------|--------|---------------------------------------|--------|
| m/z                         | weight | m/z                       | weight | m/z                                   | weight |
| 3066.0                      | 0.40   | 3528.0                    | 0.31   | 13965.5                               | 0.31   |
| 3526.0                      | 0.38   | 3530.0                    | 0.36   | 14108.0                               | 0.39   |
| 3528.0                      | 0.45   | 3532.0                    | 0.38   | 14111.5                               | 0.40   |
| 3530.5                      | 0.38   | 3534.5                    | 0.36   | 14115.0                               | 0.39   |
| 3542.0                      | 0.39   | 3536.0                    | 0.32   | 14119.0                               | 0.39   |
| 3543.5                      | 0.39   | 3670.5                    | 0.33   | 14123.5                               | 0.39   |
| 5564.5                      | 0.43   | 3826.0                    | 0.32   | 14165.5                               | 0.32   |
| 5567.0                      | 0.44   | 3828.0                    | 0.34   | 14177.0                               | 0.32   |
| 9557.0                      | 0.30   | 5562.0                    | 0.33   | 14181.5                               | 0.32   |
| 10607.0                     | 0.30   | 5565.0                    | 0.45   | 14189.0                               | 0.32   |
|                             |        | 5567.0                    | 0.47   | 14192.5                               | 0.32   |
|                             |        | 5569.5                    | 0.37   | 14215.5                               | 0.32   |
|                             |        | 7057.0                    | 0.33   | 14231.5                               | 0.30   |
|                             |        | 7060.0                    | 0.37   | 14277.5                               | 0.33   |
|                             |        | 7063.0                    | 0.38   | 14282.0                               | 0.34   |
|                             |        | 7065.5                    | 0.36   | 14286.0                               | 0.34   |
|                             |        | 7068.0                    | 0.34   | 14294.0                               | 0.34   |
|                             |        | 9195.0                    | 0.30   | 14313.0                               | 0.34   |
|                             |        | 9197.5                    | 0.34   | 14328.5                               | 0.34   |
|                             |        | 9207.0                    | 0.30   | 14332.0                               | 0.36   |
|                             |        | 10597.5                   | 0.44   | 14340.5                               | 0.34   |
|                             |        | 10600.5                   | 0.51   | 18347.0                               | 0.31   |
|                             |        | 10604.5                   | 0.54   | 18382.5                               | 0.32   |
|                             |        | 10607.0                   | 0.59   | 18386.5                               | 0.31   |
|                             |        | 10611.0                   | 0.53   | 18396.0                               | 0.32   |

Figure 10: Molecules expressed in different regions of the rat brain hypothalamus.

| zona incerta |        | internal capsule |        | internal capsule<br>(cont'd) |        | internal capsule<br>(cont'd) |        |
|--------------|--------|------------------|--------|------------------------------|--------|------------------------------|--------|
| m/z          | weight | m/z              | weight | m/z                          | weight | m/z                          | weight |
| 3668.5       | 0.32   | 3165.5           | 0.42   | 11960.5                      | 0.37   | 14403.0                      | 0.38   |
| 3670.5       | 0.32   | 3167.5           | 0.41   | 11964.5                      | 0.35   | 14406.5                      | 0.37   |
| 5564.5       | 0.35   | 3169.0           | 0.34   | 11968.0                      | 0.30   | 14414.5                      | 0.38   |
| 7046.0       | 0.34   | 3669.0           | 0.33   | 13850.0                      | 0.32   | 14418.0                      | 0.40   |
| 7051.5       | 0.34   | 3671.0           | 0.44   | 13907.0                      | 0.41   | 14441.5                      | 0.34   |
| 7055.0       | 0.33   | 3672.5           | 0.41   | 13961.5                      | 0.46   | 14453.0                      | 0.37   |
| 7057.0       | 0.36   | 3823.5           | 0.43   | 13980.5                      | 0.50   | 14461.0                      | 0.45   |
| 7060.0       | 0.34   | 3826.0           | 0.55   | 13991.5                      | 0.48   | 14563.0                      | 0.31   |
| 7137.0       | 0.30   | 3827.5           | 0.49   | 14007.5                      | 0.49   | 18303.0                      | 0.64   |
| 9195.0       | 0.33   | 3829.5           | 0.52   | 14050.0                      | 0.53   | 18308.0                      | 0.65   |
| 9198.0       | 0.31   | 3834.0           | 0.32   | 14061.0                      | 0.53   | 18316.0                      | 0.64   |
| 9201.5       | 0.31   | 4042.0           | 0.35   | 14072.5                      | 0.55   | 18321.0                      | 0.63   |
| 10597.0      | 0.30   | 4044.5           | 0.32   | 14088.5                      | 0.53   | 18352.0                      | 0.67   |
| 10600.5      | 0.38   | 4322.0           | 0.33   | 14095.5                      | 0.52   | 18360.0                      | 0.72   |
| 10604.0      | 0.39   | 4324.0           | 0.36   | 14100.0                      | 0.52   | 18374.0                      | 0.66   |
| 10607.0      | 0.40   | 4326.0           | 0.37   | 14177.0                      | 0.61   | 18378.0                      | 0.63   |
| 10611.0      | 0.34   | 4699.5           | 0.36   | 14184.5                      | 0.58   | 18382.0                      | 0.67   |
| 14088.5      | 0.35   | 5291.5           | 0.34   | 14189.0                      | 0.57   | 18404.5                      | 0.58   |
| 14099.5      | 0.35   | 7044.0           | 0.52   | 14200.0                      | 0.59   | 18409.0                      | 0.58   |
| 14104.0      | 0.35   | 7098.5           | 0.55   | 14208.0                      | 0.57   | 18427.0                      | 0.66   |
| 14107.5      | 0.35   | 7101.5           | 0.61   | 14227.5                      | 0.57   | 18431.0                      | 0.63   |
| 14119.5      | 0.35   | 7103.5           | 0.56   | 14239.0                      | 0.61   | 18435.5                      | 0.65   |
| 14142.0      | 0.31   | 7123.5           | 0.55   | 14247.0                      | 0.56   | 18457.0                      | 0.57   |
| 14154.0      | 0.31   | 7142.5           | 0.61   | 14258.5                      | 0.62   | 18461.5                      | 0.52   |
| 14161.5      | 0.32   | 7153.5           | 0.51   | 14266.5                      | 0.57   | 18483.5                      | 0.54   |
| 14165.5      | 0.31   | 7159.0           | 0.52   | 14285.5                      | 0.59   | 18493.0                      | 0.47   |
| 14177.5      | 0.30   | 7161.5           | 0.52   | 14290.0                      | 0.52   | 18502.0                      | 0.50   |
| 18342.5      | 0.36   | 7178.0           | 0.50   | 14305.5                      | 0.58   | 18510.0                      | 0.51   |
| 18360.5      | 0.35   | 7197.0           | 0.36   | 14312.5                      | 0.52   | 18528.5                      | 0.41   |
| 18373.5      | 0.36   | 7202.5           | 0.30   | 14321.0                      | 0.52   | 18550.5                      | 0.41   |
| 18382.5      | 0.33   | 9191.5           | 0.43   | 14348.0                      | 0.52   | 18554.5                      | 0.54   |
| 18387.0      | 0.34   | 9195.0           | 0.60   | 14351.5                      | 0.53   | 18563.5                      | 0.38   |
| 18404.0      | 0.32   | 9198.0           | 0.49   | 14356.0                      | 0.54   | 18576.5                      | 0.45   |
|              |        | 9201.0           | 0.46   | 14363.5                      | 0.66   | 18581.5                      | 0.38   |
|              |        | 9204.5           | 0.50   | 14391.0                      | 0.55   | 18607.5                      | 0.36   |

Figure 11: Molecules expressed in other various regions of the rat brain.



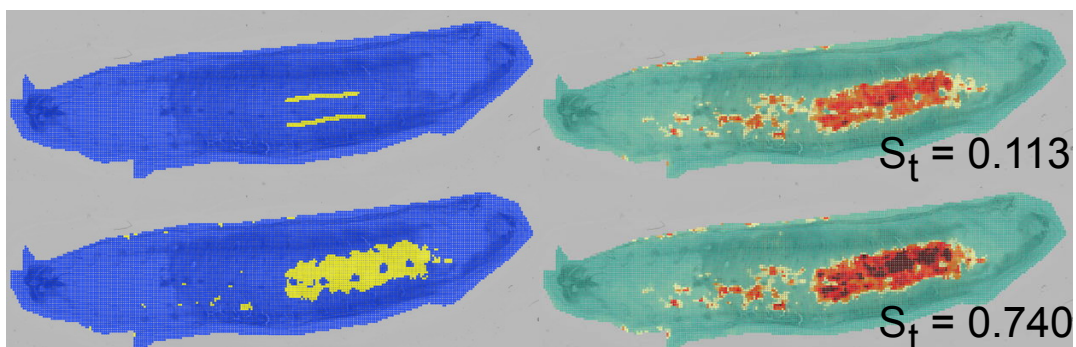

Figure 12: Query consistency scores. In the top panel, the original query (left) recruits may other spots (right) sharing a similar molecular signature, thus resulting in a low consistency score (0.113). In the bottom panel, the query and query-result are very similar indicating that all spots within the query have similar molecular signatures and spots outside the query have different molecular signatures. This results in a much higher consistency score (0.74).

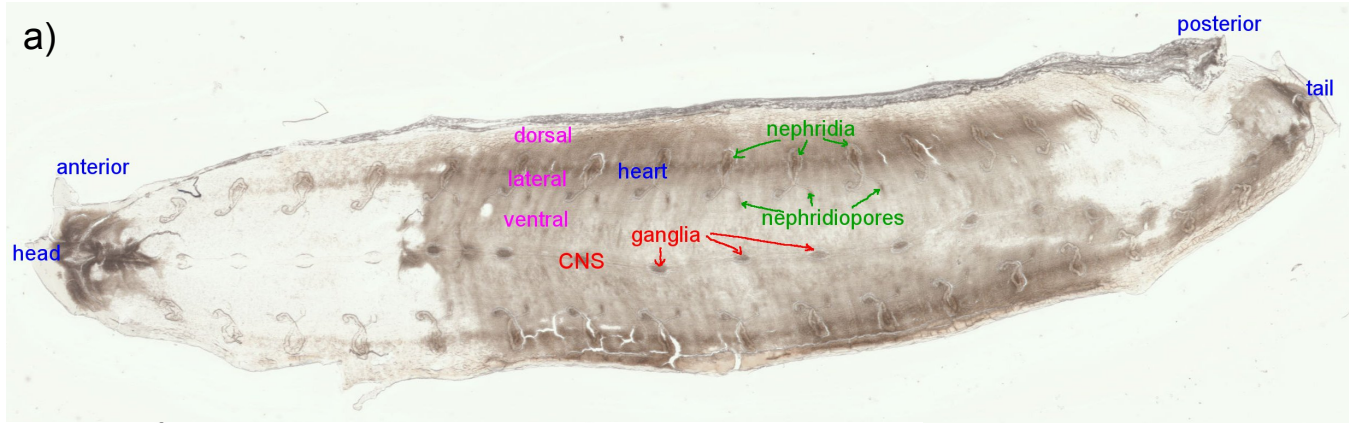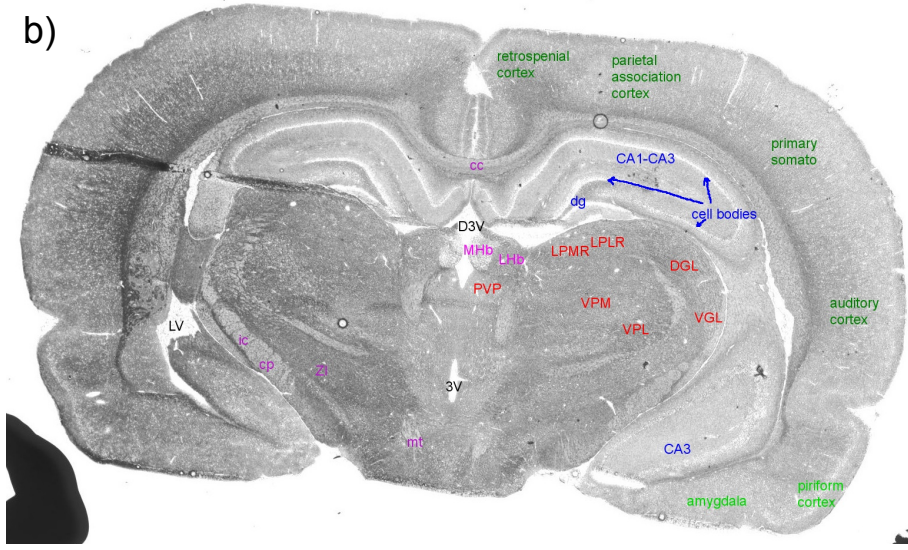

- 3V - third ventricle
- D3V - dorsal third ventricle
- LV - lateral ventricle
- dg - dentate gyrus
- MHb - medial habenular nucleus
- LHb - lateral habenular nucleus
- PVP - paraventricular thalamic nucleus posterior part
- LPMR/LPLR - lateral posterior thalamic nucleus, mediostral/laterostral part
- VPM - ventral posterolateral thalamic nucleus
- VPL - ventral posteromedial thalamic nucleus
- DLG - dorsal lateral geniculate nucleus
- VLG - ventral lateral geniculate nucleus
- ic/cp - internal capsule / cerebral peduncle
- ZI - zona incerta
- mt - mammillothalamic tract
- cc - corpus callosum

Figure 13: Basic anatomy for the a) the leech embryo and b) the rat brain slice.
